# Supplementary material for: Cu–Ag core–shell nanowires for electronic skin with a petal molded microstructure
Source: Royal Society of Chemistry journal article supplement (doi:10.1039/c5tc01723h), 2015-01-01
Supplement: c5tc01723h1.pdf [file c5tc01723h1.pdf]

## **Supporting Information**

### **Cu–Ag core–shell nanowires for electronic skin with a petal molded microstructure**

Yong Wei, Song Chen, Yong Lin, Zimei Yang, Lan Liu\*

College of Materials Science and Engineering, Key Lab of Guangdong Province for  
High Property and Functional Macromolecular Materials, South China University of  
Technology, Guangzhou 510641, PR China.

**E–mail:** pslilian@scut.edu.cn

## **Experimental Section**

**Preparation of CuNWs and Cu-Ag core-shell NWs films:** The bulky CuNWs film and Cu-Ag core-shell nanowires film (about  $120 \text{ mg}\cdot\text{m}^{-2}$ ) were formed by the vacuum filtration method without adding any polymer. The electrical resistance was immediately measured after the bulky film dried in vacuum oven at  $50 \text{ }^\circ\text{C}$  for 1.0 h.

**Preparation of PDMS/CuNWs conductor:** The PDMS/CuNWs conductor was fabricated according to Ref. 1. Typically, CuNWs was dropped on a glass slide (about  $120 \text{ mg}\cdot\text{m}^{-2}$ ) and dried in vacuum oven at  $50 \text{ }^\circ\text{C}$  for 1.0 h. After that, liquid PDMS was immediately poured onto the CuNWs film, the liquid PDMS will penetrate into the CuNWs network due to its low viscosity and low surface energy. Then the PDMS was cured at  $100 \text{ }^\circ\text{C}$  for 1 h and peeled off, highly cross-linked PDMS with CuNWs embedded on surface was obtained.

Table S1 Property comparison of copper, silver and gold.

| Property             | Copper                                       | Silver                                       | Gold                                         |
|----------------------|----------------------------------------------|----------------------------------------------|----------------------------------------------|
| Resistivity          | $1.78 \times 10^{-6} \Omega \cdot \text{cm}$ | $1.65 \times 10^{-6} \Omega \cdot \text{cm}$ | $2.05 \times 10^{-6} \Omega \cdot \text{cm}$ |
| Content in earth     | 0.01%                                        | 0.00001%                                     | 0.0000001%                                   |
| Price                | \$ 5.941/g for CuNWs                         | \$ 32.590/g for AgNWs <sup>1</sup>           | \$ 1365.298/g for AuNWs                      |
|                      | \$ 6.4/kg for bulk copper                    | \$ 517.1/kg for bulk silver                  | \$ 37000/kg for bulk gold                    |
| Thermal conductivity | 400 W/m·K                                    | 429 W/m·K                                    | 318 W/m·K                                    |
| Oxidative stability  | Very poor                                    | Excellent                                    | Excellent                                    |

### Calculation of the price of AuNWs

According to the Ref.2, 44 mg chloroauric acid ( $\text{HAuCl}_4 \cdot 3\text{H}_2\text{O}$ ), 1.5 mL oleylamine (OA) and 2.1 mL triisopropylsilane (TIPS) were required to synthesis gold nanowires (AuNWs). The price of  $\text{HAuCl}_4 \cdot 3\text{H}_2\text{O}$ , OA and TIPS are \$ 80.5/g, \$ 0.65/mL and \$ 4.5/mL (The price of the reactants were taken from Aladdin), if the productivity of AuNWs is 100% and the price of solvent to wash the AuNWs is not taken into consideration, the price of AuNWs is about \$ 1365.298/g.

Table S2 Summary of core-shell nanowires based on CuNWs reported up to now.

| Core         | Shell     | Method                                                                              | Applications                                                                 | Reference        |
|--------------|-----------|-------------------------------------------------------------------------------------|------------------------------------------------------------------------------|------------------|
| CuNWs        | Ni        | One pot method at 180 °C                                                            | Flexible conductor                                                           | 3                |
| CuNWs        | Pt        | Electrodeposition method                                                            | Transparent electrode                                                        | 4                |
| CuNWs        | Zn        | Electrodeposition method                                                            | Transparent electrode                                                        | 5                |
|              | Sn        | Electrodeposition method                                                            | Transparent electrode                                                        |                  |
| CuNWs        | Ni        | One pot method at 210 °C                                                            | Tunable optic and magnetic properties                                        | 6                |
|              | Au        |                                                                                     |                                                                              |                  |
| CuNWs        | Pt        | Galvanic displacement                                                               | Oxygen Reduction Electrocatalysts                                            | 7                |
| CuNWs        | Au        | Electrodeposition method                                                            | DNA detection                                                                | 8                |
| CuNWs        | Ni        | One pot method at 210 °C                                                            | Potential application in microelectronics and magnetic recyclable catalysis. | 9                |
| CuNWs        | Ag        | Two step method (Ag-amine reagent solution)                                         | Conductive Fillers for LDPE                                                  | 10               |
| CuNWs        | Ag        | Replacement reaction with citric acid and PVP                                       | Not provided                                                                 | 11               |
| CuNWs        | Ni        | Electroplate                                                                        | Transparent electrode                                                        | 12               |
| CuNWs        | CNTs      | Self-Scrolling                                                                      | Building blocks for novel functional materials                               | 13               |
| CuNFs        | AZO       | Electrospinning and reduction                                                       | Transparent Electrode                                                        | 14               |
| CuNWs        | C         | CVD followed by thermal decomposition                                               | Electronic transport and thermal conductivity                                | 15,16            |
| CuNWs        | ODA       | Hydrothermal treatment                                                              | Conductive Fillers for PS                                                    | 17               |
| CuNWs        | FeCo      | Electrodeposition method                                                            | Control delivery of drugs or macromolecules                                  | 18               |
| CuNWs        | Graphene  | PVD at 650 °C                                                                       | Electrical and thermal conductivity enhancement                              | 19               |
| <b>CuNWs</b> | <b>Ag</b> | <b>Galvanic displacement at room temperature without any stirring or dispersant</b> | <b>Flexible E-skin</b>                                                       | <b>This work</b> |

**Abbreviations:** CuNFs, copper nanofibers; AZO, aluminum-doped zinc oxide; ODA, octadecylamine; CVD, chemical vapor deposition; PVD, physical vapor deposition; LDPE, low density polyethylene; DNA, deoxyribonucleic acid; PS, polystyrene.

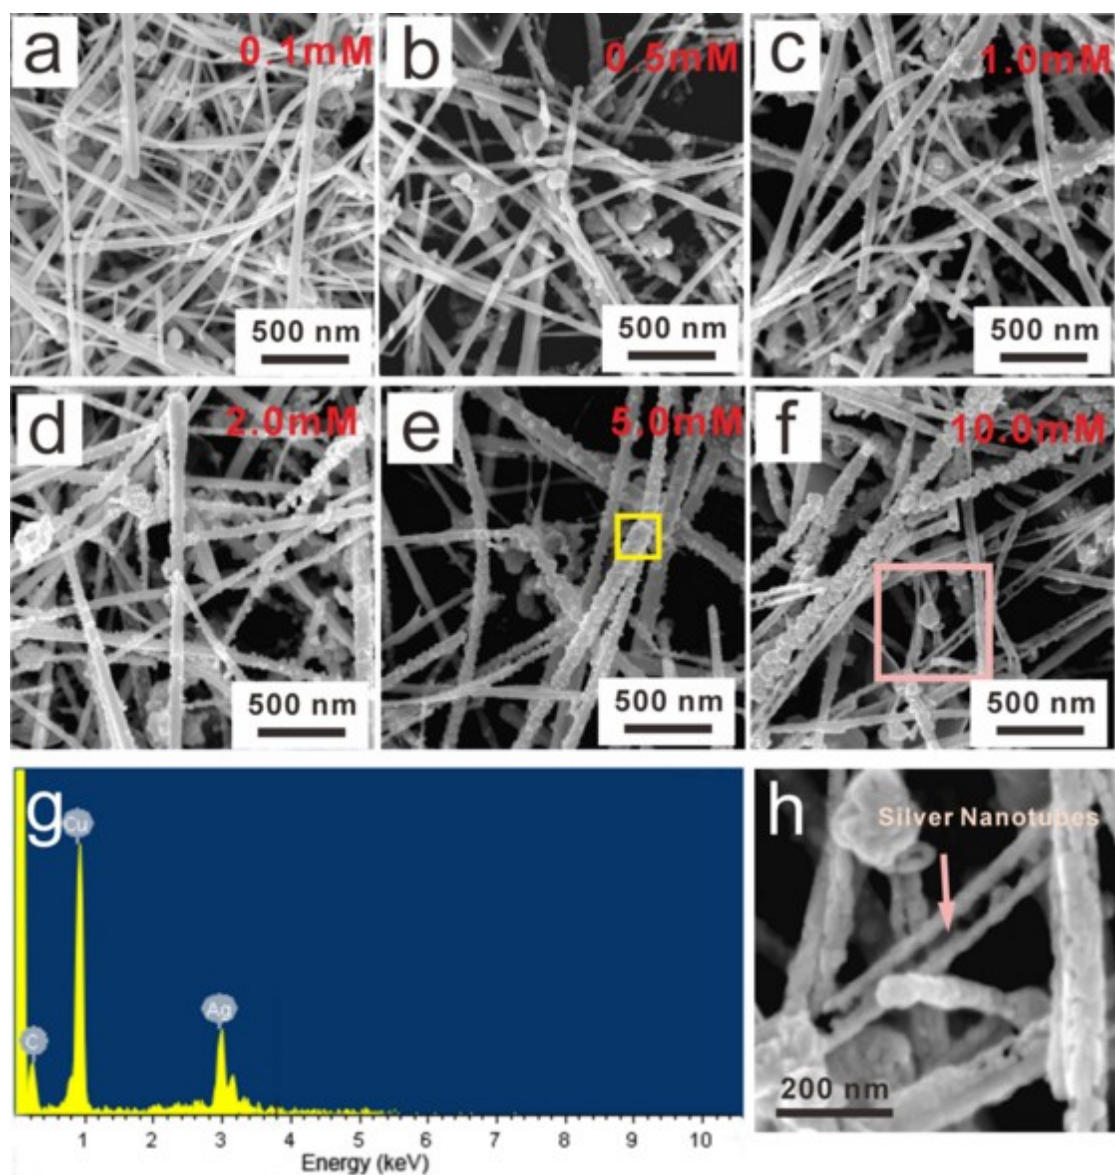

Fig.S1 Formation of Cu-Ag alloyed structure through galvanic replacement reaction between CuNWs and AgNO<sub>3</sub> solution. FESEM images were taken after reacting 2.0 mL 5 mg·mL<sup>-1</sup> CuNWs suspension with 100 mL of (a) 0.1 mM, (b) 0.5 mM, (c) 1.0 mM, (d) 2.0 mM, (e) 5.0 mM and (f) 10.0 mM AgNO<sub>3</sub> solution for 30 min. (g) is the EDAX spectrum of selected area in Fig.3e and (h) is the higher magnification of the selected area in Fig.3f.

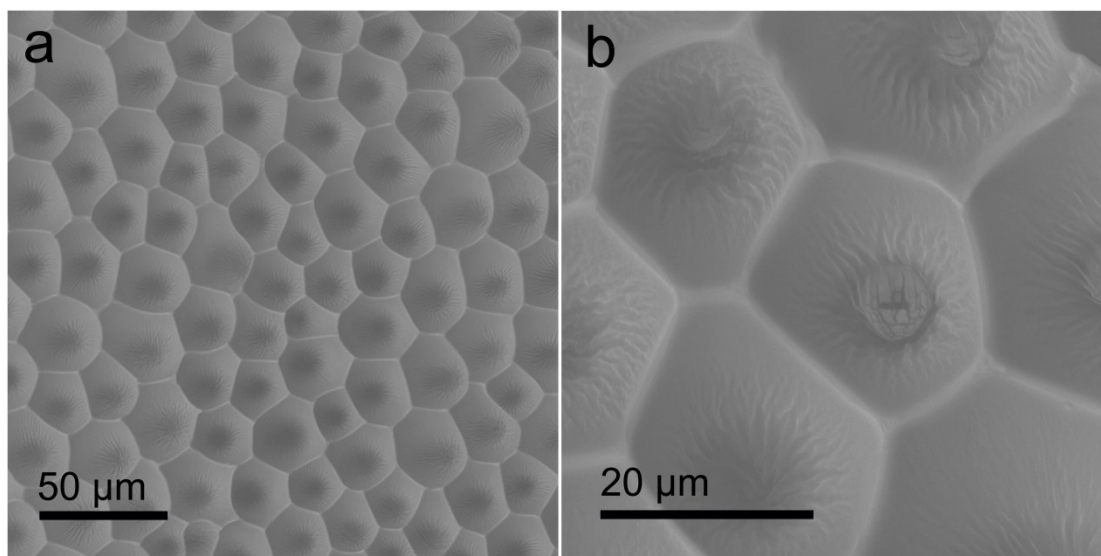

Fig.S2 FESEM images of m-PVA film with different magnifications to show the honeycomb-like structure of surface of m-PVA film.

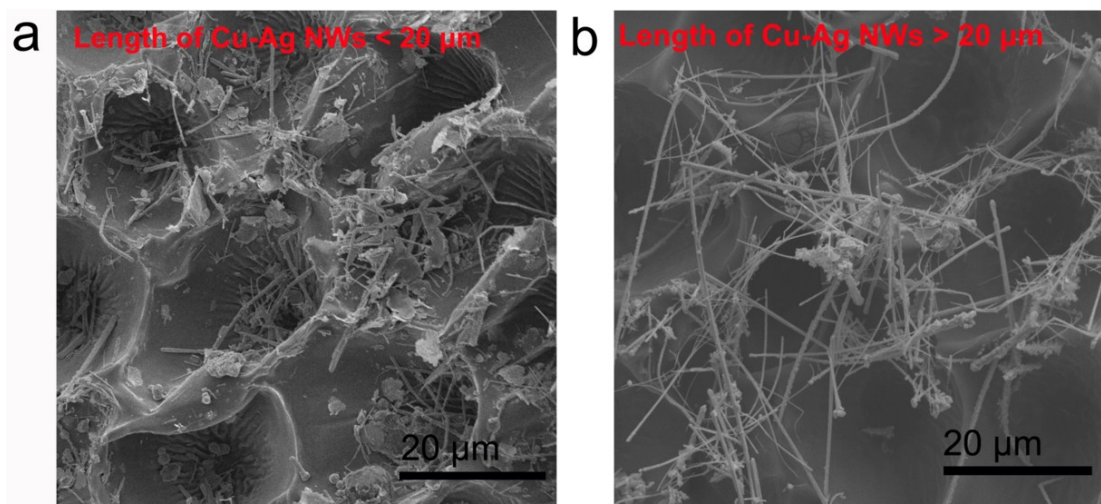

Fig.S3 FESEM images of Cu-Ag NWs with different length dropp-coated on m-PVA film showing that only the Cu-Ag NWs with suitable length ( $< 20 \mu\text{m}$ ) can penetrate into the honeycomb-like holes on the surface of m-PVA film. To synthesis longer CuNWs ( $> 20\mu\text{m}$ ), a higher EDA concentration (120 mM) and longer reaction time (2.0 h) was performed.

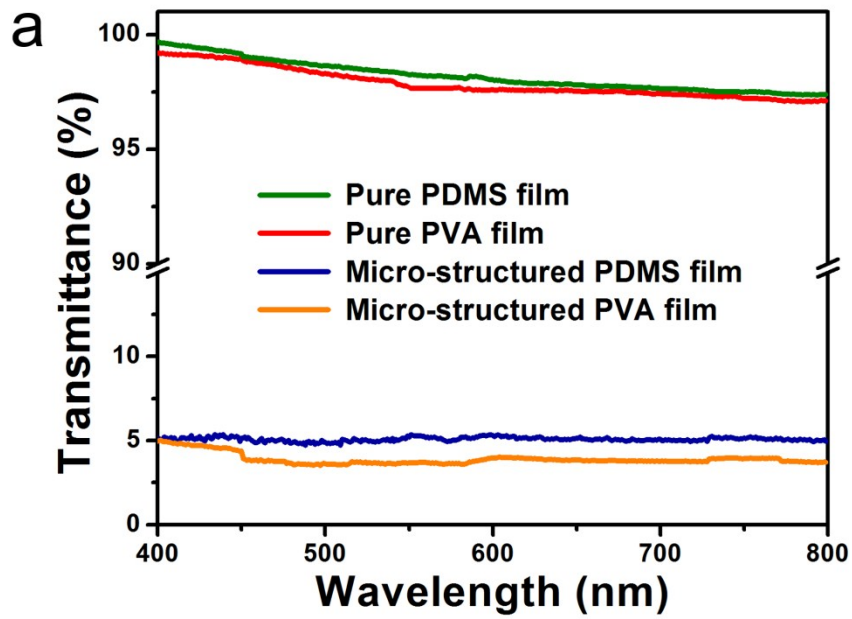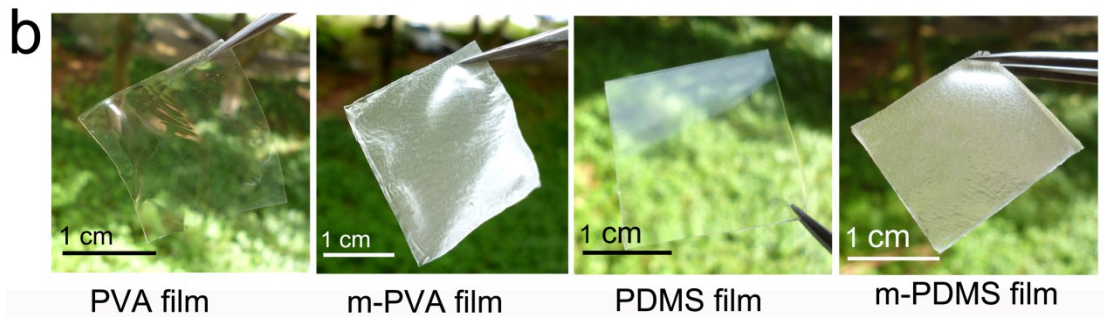

Fig.S4 Optical transmittance (a) and digital photographs (b) of the pure PDMS and PVA film, micro-structured PDMS and PVA film (m-PDMS and m-PVA film).



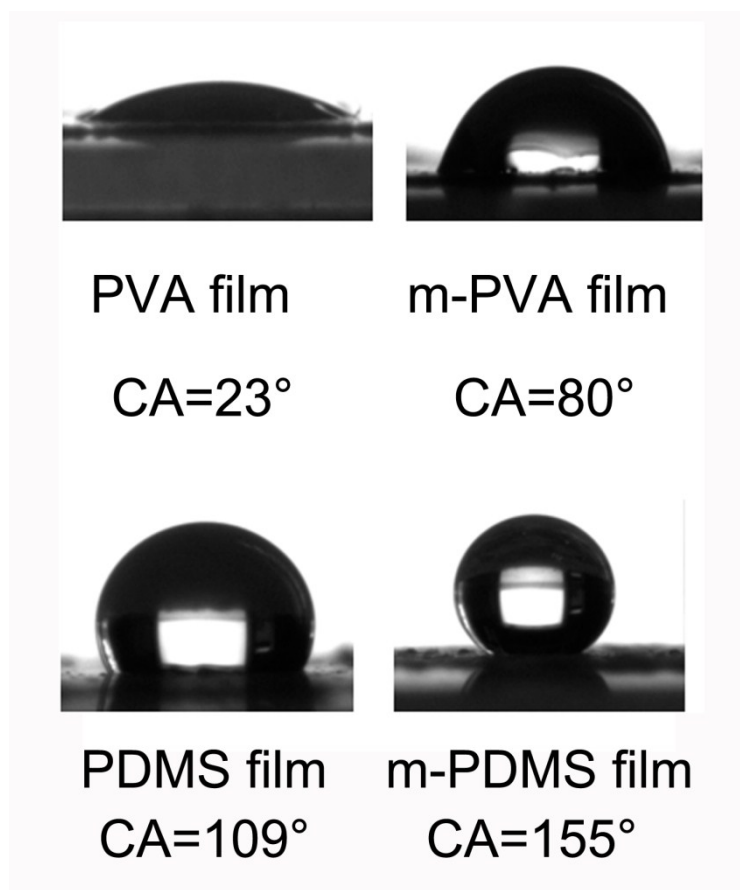

Fig.S5 Contact angle of pure PDMS film, PVA film, m-PDMS and m-PVA film.

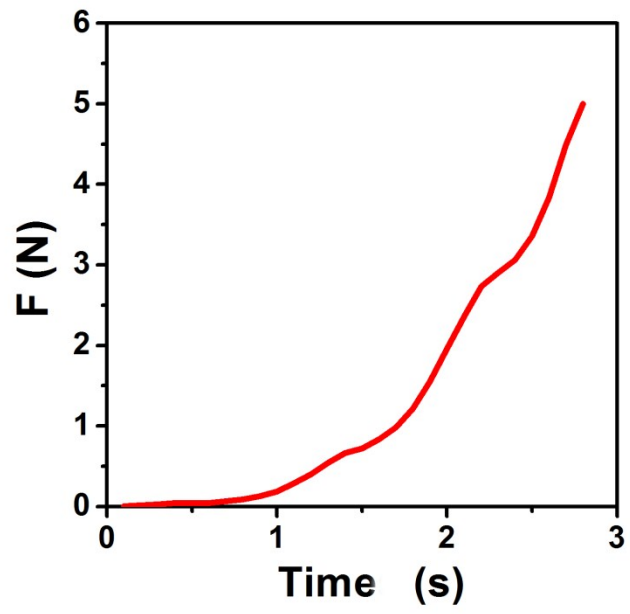

Fig.S6 The force applied to e-skin during the compression test.

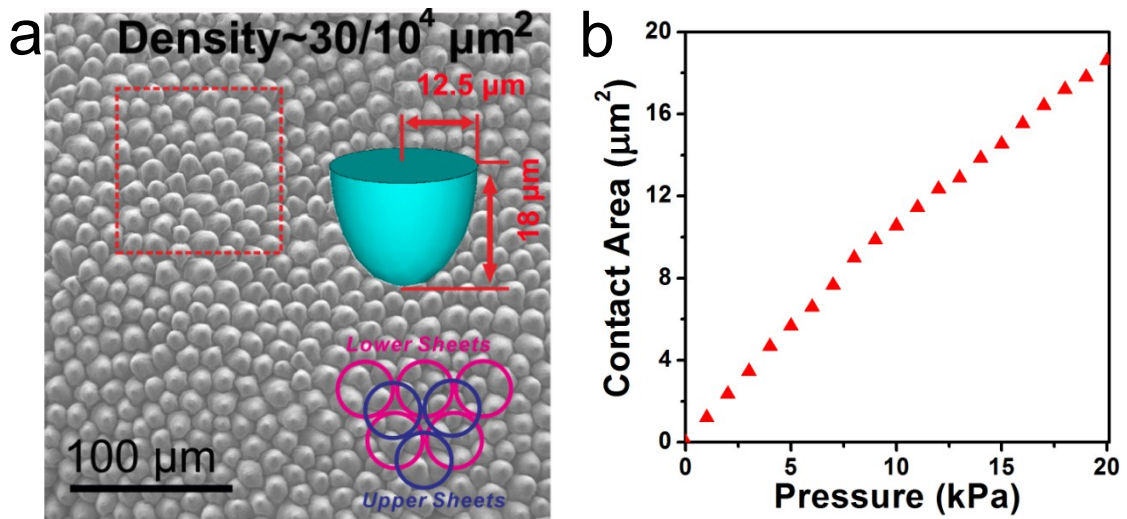

Fig.S7 (a) SEM images of the surface of rose petal to show the information about the micropapillae arrays, which can be approximated as ellipsoids (semiminor and semimajor axis are given as 12.5  $\mu\text{m}$  and 18 $\mu\text{m}$ ). (b) Change in contact area for the micropapillae arrays as a function of pressure from 0-20 kPa.

## References

- 1 A. R. Rathmell, S. M. Bergin, Y. L. Hua, Z. Y. Li and B. J. Wiley, *Adv. Mater.*, 2010, **22**, 3558.
- 2 S. Gong, W. Schwalb, Y. Wang, Y. Chen, Y. Tang, J. Si, B. Shirinzadeh and W. Cheng, *Nat. Commun.*, 2014, **5**, 3132.
- 3 J. Song, J. Li, J. Xu and H. Zeng, *Nano Lett.*, 2014, **14**, 6298.
- 4 Z. Chen, S. Ye, A. R. Wilson, Y. C. Haac and B. J. Wiley, *Energy Environ. Sci.*, 2014, **7**, 1461.
- 5 Z. Chen, S. Ye, I. E. Stewart and B. J. Wiley, *ACS Nano*, 2014, **8**, 9673.
- 6 D. Zeng, Y. Chen, A. Lu, M. Li, H. Guo, J. Wang and D. L. Peng, *Chem. Commun.*, 2013, **49**, 11545.
- 7 S. M. Alia, K. Jensen, C. Contreras, F. Garzon, B. Pivovar and Y. Yan, *ACS Catal.*, 2013, **3**, 358.
- 8 E. Spain, A. McCooey, C. Dolan, H. Bagshaw, N. Leddy, T. E. Keyesa and R. J. Forster, *Analyst*, 2014, **139**, 5504.
- 9 H. Guo, Y. Chen, H. Ping, J. Jin and D. L. Peng, *Nanoscale*, 2013, **5**, 2394.
- 10 X. Luo, G. A. Gelves, U. Sundararaj and J. L. Luo, *Can. J. Chem. Eng.*, 2013, **91**, 630.
- 11 J. Zhao, D. Zhang and X. Zhang, *Surf. Interface Anal.*, 2015, **47**, 529.
- 12 A. R. Rathmell, M. Nguyen, M. Chi and B. J. Wiley, *Nano Lett.*, 2012, **12**, 3193.
- 13 K. Yan, Q. Xue, D. Xia, H. Chen, J. Xie and M. Dong, *ACS Nano*, 2009, **3**, 2235.
- 14 P. C. Hsu, H. Wu, T. J. Carney, M. T. McDowell, Y. Yang, E. C. Garnett, M. Li, L. Hu and Y. Cui, *ACS Nano*, 2012, **6**, 5150.
- 15 Y. Zhao, J. Wang, Y. Zhang, Y. Li and Z. Yan, *New J. Chem.*, 2012, **36**, 1255.
- 16 Y. Zhao, Y. Zhang, Y. Li and Z. Yan, *New J. Chem.*, 2012, **36**, 1161.

- 17 L. He and S. C. Tjong, *RSC Adv.*, 2015, **5**, 38452.
- 18 B. Özkale, N. Shamsudhin, G. Chatzipirpiridis, M. Hoop, F. Gramm, X. Chen, X. Martí, J. Sort, E. Pellicer and S. Pane, *ACS Appl. Mater. Interfaces*, 2015, **7**, 7389.
- 19 R. Mehta, S. Chugh and Z. Chen, *Nano Lett.*, 2015, **15**, 2024.
